# Supplementary material for: Treatment of Food Aversion and Eating Problems in Children with Short Bowel Syndrome: A Systematic Review
Source: MDPI journal article supplement (doi:10.3390/children9101582), 2022-10-19
Supplement: s1 [file s1]

## SUPPLEMENTARY FILE

**Table S1.** Quality assessment results for case reports.

| Author and Year of Publication                                                       | Linscheid, 1987 [15] | Groff, 2011 [16] |
|--------------------------------------------------------------------------------------|----------------------|------------------|
| Were patient's demographic characteristics clearly described?                        | Yes                  | Yes              |
| Was the patient's history clearly described and presented as a timeline?             | Yes                  | Yes              |
| Was the current clinical condition of the patient on presentation clearly described? | Yes                  | Yes              |
| Were diagnostic tests or assessment methods and the results clearly described?       | Not applicable       | Not applicable   |
| Was the intervention(s) or treatment procedure(s) clearly described?                 | Yes                  | Yes              |
| Was the post-intervention clinical condition clearly described?                      | Yes                  | Yes              |
| Were adverse events (harms) or unanticipated events identified and described?        | Not applicable       | Not applicable   |
| Does the case report provide takeaway lessons?                                       | Yes                  | Yes              |
| Overall appraisal                                                                    | Include              | Include          |

**Table S2.** Quality assessment results for case series.

| Author and Year of Publication                                                       | Linscheid, 1987 [15] | Groff, 2011 [16] |
|--------------------------------------------------------------------------------------|----------------------|------------------|
| Were patient's demographic characteristics clearly described?                        | Yes                  | Yes              |
| Was the patient's history clearly described and presented as a timeline?             | Yes                  | Yes              |
| Was the current clinical condition of the patient on presentation clearly described? | Yes                  | Yes              |

|                                                                                |                |                |
|--------------------------------------------------------------------------------|----------------|----------------|
| Were diagnostic tests or assessment methods and the results clearly described? | Not applicable | Not applicable |
| Was the intervention(s) or treatment procedure(s) clearly described?           | Yes            | Yes            |
| Was the post-intervention clinical condition clearly described?                | Yes            | Yes            |
| Were adverse events (harms) or unanticipated events identified and described?  | Not applicable | Not applicable |
| Does the case report provide takeaway lessons?                                 | Yes            | Yes            |
| Overall appraisal                                                              | Include        | Include        |
